# Supplementary material for: Selenoprotein MsrB1 promotes anti-inflammatory cytokine gene expression in macrophages and controls immune response in vivo
Source: PubMed Central journal article supplement (PMC5506048; doi:10.1038/s41598-017-05230-2), 2017-07-11
Supplement: 41598_2017_5230_MOESM1_ESM.pdf [file 41598_2017_5230_MOESM1_ESM.pdf]

**Selenoprotein MsrB1 promotes anti-inflammatory cytokine gene expression in macrophages and controls immune response *in vivo***

Byung Cheon Lee<sup>1</sup>, Sang-Goo Lee<sup>2</sup>, Min-Kyung Choo<sup>3</sup>, Ji Hyung Kim<sup>4</sup>, Hae Min Lee<sup>1</sup>, Sorah Kim<sup>1</sup>, Dmitri E. Fomenko<sup>5</sup>, Hwa-Young Kim<sup>6</sup>, Jin Mo Park<sup>3</sup>, and Vadim N. Gladyshev<sup>2</sup>

<sup>1</sup>College of Life Sciences and Biotechnology, Korea University, Seoul, 02841, South Korea;

<sup>2</sup>Division of Genetics, Department of Medicine, Brigham & Women's Hospital and Harvard Medical School, Boston, MA 02115, USA; <sup>3</sup>Cutaneous Biology Research Center, Massachusetts General Hospital and Harvard Medical School, Charlestown, MA 02129, USA; <sup>4</sup>Program in Cellular and Molecular Medicine, Boston Children's Hospital, Department of Microbiology and Immunobiology, Harvard Medical School, Boston, MA 02115 USA; <sup>5</sup>Department of Biochemistry and Redox Biology Center, University of Nebraska, Lincoln, NE 68588, USA; <sup>6</sup>Department of Biochemistry and Molecular Biology, Yeungnam University College of Medicine, Daegu, 42415, South Korea

Table S1. Oligonucleotide primers used in qPCR.

| Gene          | Forward primer (5' to 3')  | Reverse primer (5' to 3') |
|---------------|----------------------------|---------------------------|
| <i>Ccl3</i>   | ccaagtcttctcagcgccat       | tccggctgtaggagaagcag      |
| <i>Ccl4</i>   | gacttgagttgaactgagcagc     | aggcctctcctgaagtggc       |
| <i>Ch25h</i>  | ccacgacatgcatcactctc       | gcattttgtcccagtgtgtg      |
| <i>Csf2</i>   | ggccttggaagcatgtagag       | gcatgtcatccaggaggctc      |
| <i>Cxcl1</i>  | gccaatgagctgcgctgt         | ccttcaagctctggatgttctg    |
| <i>Cxcl2</i>  | atccagagcttgagtgtgacgc     | aaggcaaacttttgaccgcc      |
| <i>Cxcl10</i> | gaatccggaatctaagaccatcaa   | gtgcgtggcttactccagt       |
| <i>Dusp1</i>  | ccatctgccttgcttacctc       | aagctgaagttcggggagat      |
| <i>Edn1</i>   | aaggcatcttttcgtgttgc       | ttgtgcgtcaactctggtc       |
| <i>Ifnb1</i>  | cgtgggagatgcctcaact        | acctttgcaccctccagtaa      |
| <i>Il1a</i>   | tccagggcagagaggagt         | ggaactttggccatcttgattt    |
| <i>Il1b</i>   | gtggctgtggagaagctgtg       | gaaggtccacgggaaagacac     |
| <i>Il1rn</i>  | ttacaaggaccaaatacaactagaag | ggatgccaagaacacactatg     |
| <i>Il6</i>    | ccagaaaccgctatgaagtcc      | ttgtcaccagcatcagtccc      |
| <i>Il10</i>   | gaagctgaagaccctcagga       | ttttcacaggggagaaatcg      |
| <i>Il12a</i>  | cagaaacctctgtgggaga        | ggagctcagatagccatca       |
| <i>Il12b</i>  | atccagcgcaagaagaaaa        | ggaacgcacctttctggta       |
| <i>Msrbl</i>  | agcgttactgaaacctacc        | ttttctcagggcacttggctc     |
| <i>Nos2</i>   | caagcaccttgaagaggag        | ccaaatgtgcttgcaccac       |
| <i>Ppia</i>   | atggtaacccccaccgtgt        | ttcttgctgtctttggaacttggc  |
| <i>Ptgs2</i>  | ccccacagtcaaagacact        | ggttctcagggatgtgagga      |
| <i>Tnf</i>    | acagaaagcatgatccgcg        | gcccccatcttttggg          |

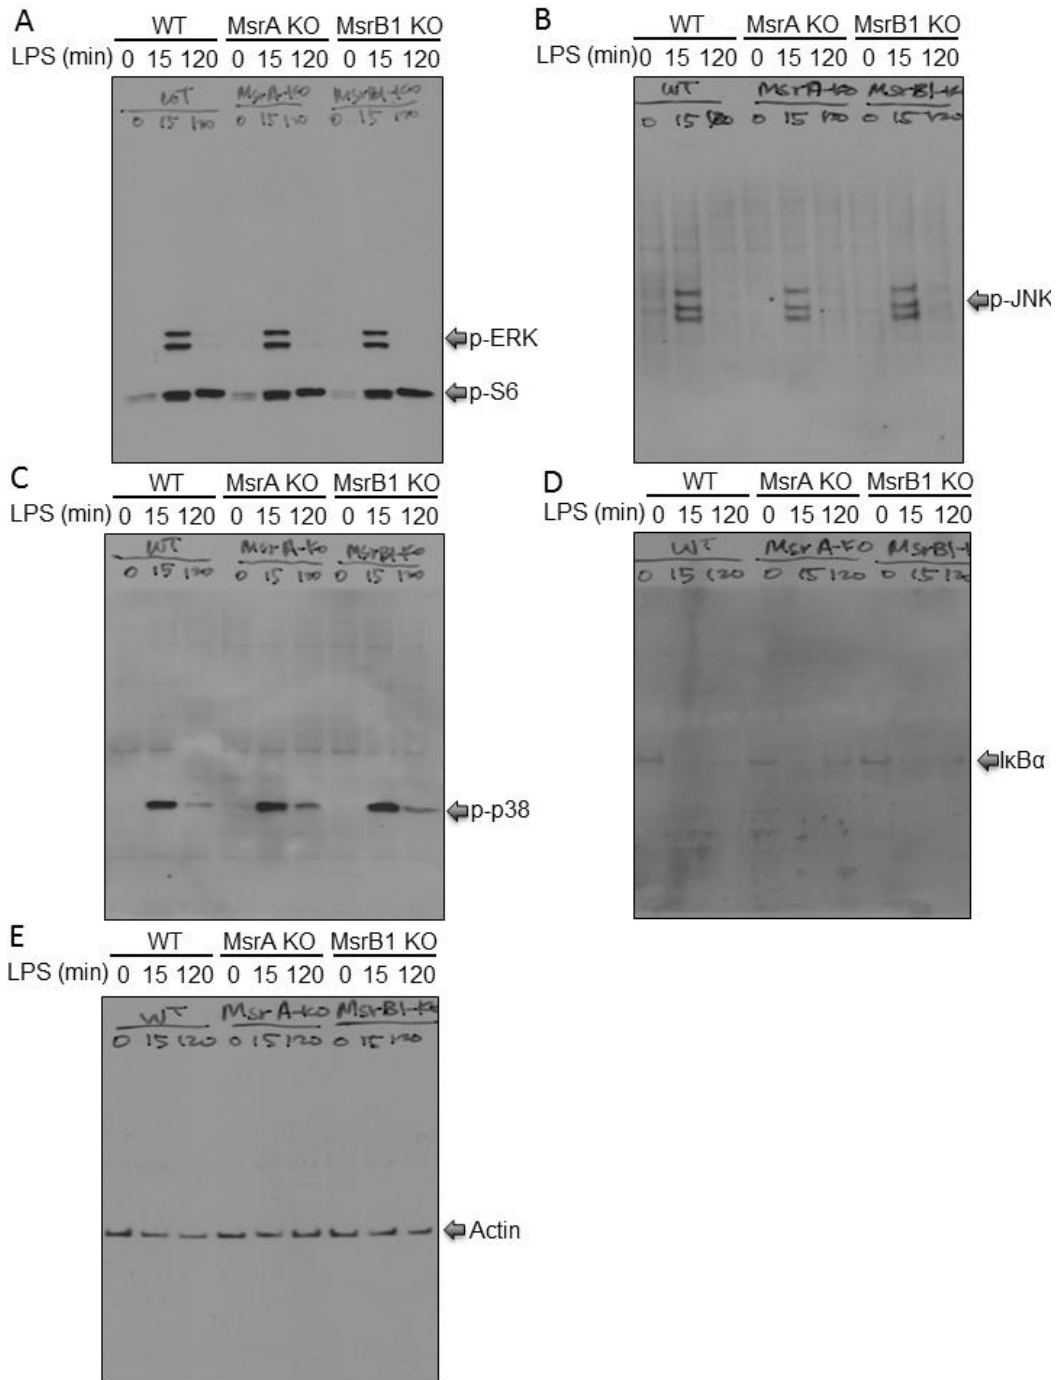

Supplementary Figure S1. Full-length image of western blot analysis. (A-E) All figures are full-length image of western blot analysis of ERK, JNK, p38, and S6 phosphorylation and I $\kappa$ B $\alpha$  degradation in WT, MsrA KO, and MsrB1 KO BMDMs after the indicated duration of LPS stimulation in Figure 2.

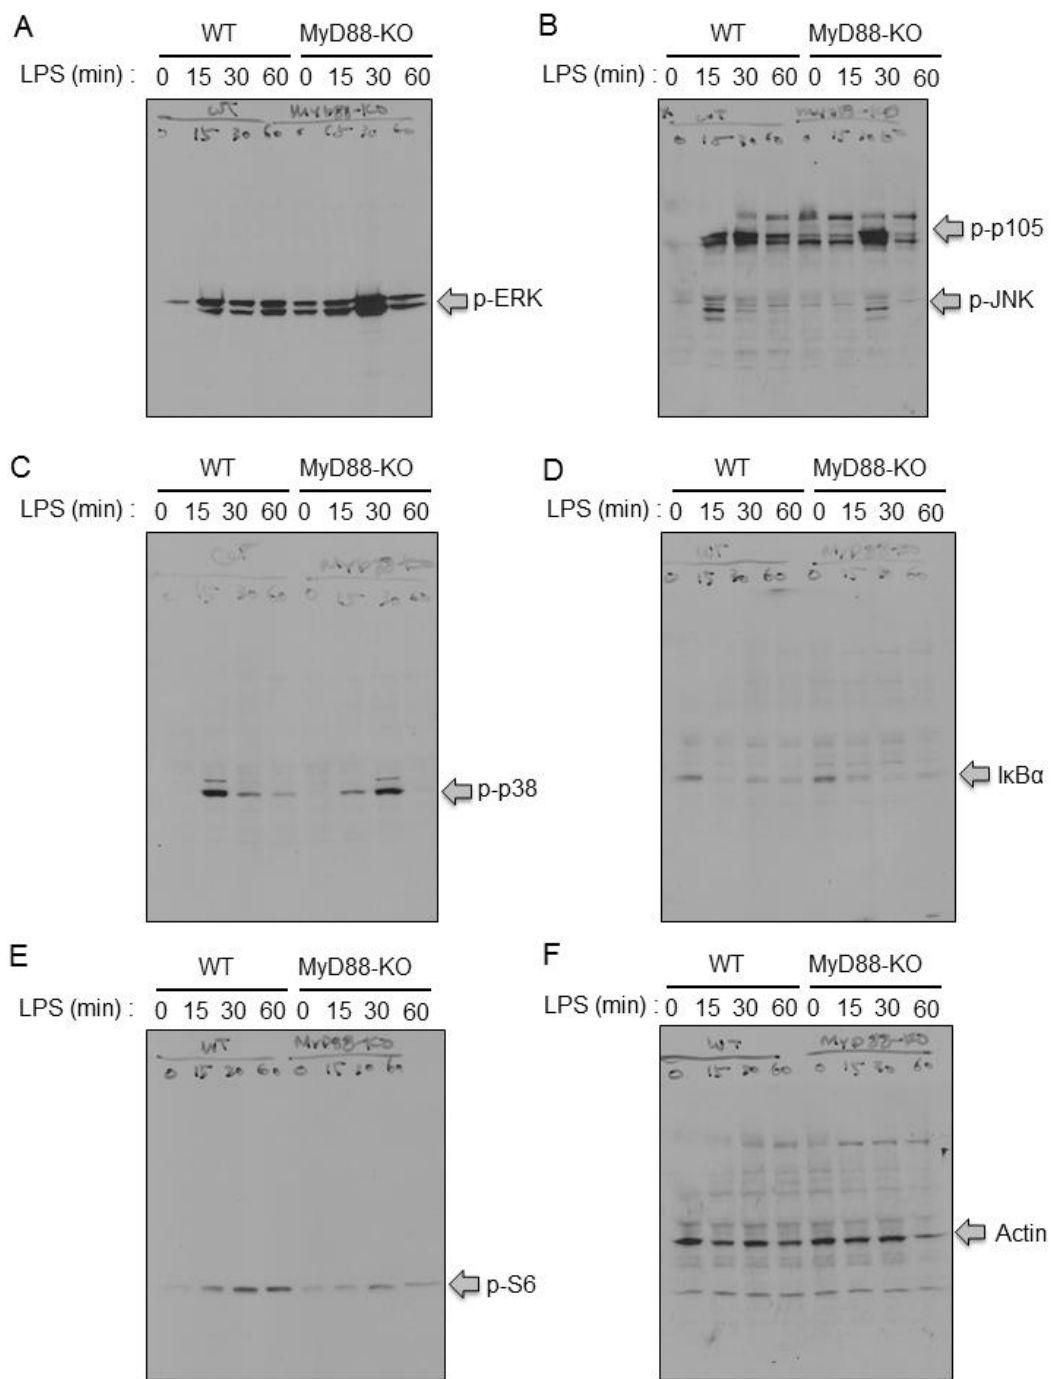

Supplementary Figure S2. Full-length image of western blot analysis. (A-F) All figures are full-length image of western blot analysis of ERK, JNK, p38, and S6 phosphorylation and I $\kappa$ B $\alpha$  degradation in WT and MyD88 KO BMDMs after the indicated duration of LPS stimulation in Figure 2.

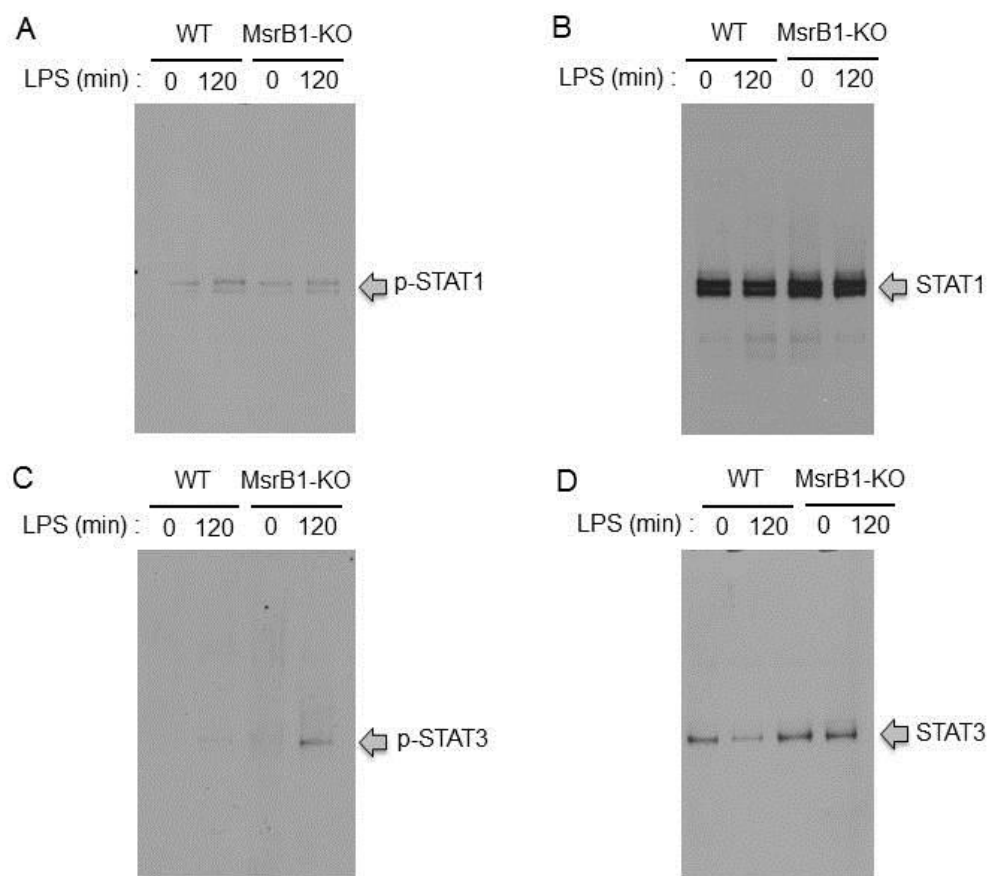

Supplementary Figure S3. Full-length image of western blot analysis. (A-D) All panels are full images representing western blot analysis of STAT1 and STAT3 phosphorylation in WT and MsrB1 KO BMDMs after the indicated duration of LPS stimulation (Figure 6C).
